# Supplementary material for: Aureimonas altamirensis: First Isolation from a Chicken Slaughterhouse in Italy Followed by Genotype and Phenotype Evaluations
Source: MDPI journal article supplement (doi:10.3390/microbiolres14030089), 2023-09-12
Supplement: s1 [file s1]

**Supplementary Table S1. QUAST statistics about AAI genome.** In the table are indicated information about AAI genome assembly characteristics that include number of contigs, GC percentage, genome size, N50-75, L50-75. The sequencing coverage has been calculated as follows: coverage (reads nr. \* reads length)/genome size).

| <b>AAI assembly characteristics</b> |         |
|-------------------------------------|---------|
| Coverage                            | 383     |
| contigs ( $\geq 0$ bp)              | 58      |
| contigs ( $\geq 1000$ bp)           | 46      |
| contigs ( $\geq 5000$ bp)           | 40      |
| contigs ( $\geq 10000$ bp)          | 37      |
| contigs ( $\geq 25000$ bp)          | 27      |
| contigs ( $\geq 50000$ bp)          | 22      |
|                                     |         |
| Total length ( $\geq 0$ bp)         | 4101808 |
| Total length ( $\geq 1000$ bp)      | 4095819 |
| Total length ( $\geq 5000$ bp)      | 4082350 |
| Total length ( $\geq 10000$ bp)     | 4060871 |
| Total length ( $\geq 25000$ bp)     | 3904567 |
| Total length ( $\geq 50000$ bp)     | 3713911 |
|                                     |         |
| Contigs nr. ( $> 500$ bp)           | 53      |
| Largest contig                      | 519866  |
| Total length                        | 4100139 |
| GC (%)                              | 64.99   |
| N50                                 | 168583  |
| N75                                 | 103839  |
| L50                                 | 7       |
| L75                                 | 14      |
